# Supplementary material for: Bimetallic doping engineering of Ni3S2 nanosheets originating from NiFe layered double hydroxide for efficient overall water splitting
Source: Royal Society of Chemistry journal article supplement (doi:10.1039/d2cc01711c), 2022-01-01
Supplement: d2cc01711c1.pdf [file d2cc01711c1.pdf]

**Supporting Information**

**Bimetallic doping Engineering into Ni<sub>3</sub>S<sub>2</sub> Nanosheet Originated from NiFe**

**Layered Double Hydroxide for Efficient Overall Water Splitting**

Tianshan Song,<sup>a</sup> Hui Xue,<sup>\*a</sup> Jing Sun,<sup>a</sup> Niankun Guo,<sup>a</sup> Jiawen Sun,<sup>a</sup> Yi-Ru Hao,<sup>a</sup>  
and Qin Wang<sup>\*a</sup>

<sup>a</sup> College of Chemistry and Chemical Engineering, Inner Mongolia University,  
Hohhot 010021 (P. R. China)

\*Corresponding authors: E-mail: qinwang@imu.edu.cn (Q. Wang)

## **Experimental**

### **Materials**

Ni(NO<sub>3</sub>)<sub>2</sub>·6H<sub>2</sub>O, FeCl<sub>2</sub>·4H<sub>2</sub>O, urea, NH<sub>4</sub>F, Na<sub>2</sub>MoO<sub>4</sub>, Cysteine, N-Methyl pyrrolidone (NMP), and KOH are all purchased from Tianjin Fengchuan chemical reagent technology Ltd. IrO<sub>2</sub> is purchased from Aladdin. Pt/C(20wt.%) is purchased from Johnson Matthey. Deionised water is used to prepare all solutions.

### **Preparation of NiFe-LDH/NF**

Firstly, the Ni foam (2 cm×3 cm) used to be washed in 3 M HCl, deionized water, and ethanol with the assistance of ultrasonication each for 15 min. Then, Ni(NO<sub>3</sub>)<sub>2</sub>·6H<sub>2</sub>O (1 mmol), FeSO<sub>4</sub>·4H<sub>2</sub>O (0.3 mmol), urea (5 mmol) and NH<sub>4</sub>F (2 mmol) are added to a mixture of H<sub>2</sub>O (11 mL) and ethanol (2 mL), and stir for 30 minutes at room temperature. The prepared NF is immersed into the above solution. The mixture is poured into a 20 mL autoclave and kept at 120 °C for 8 hours. The sample is rinsed with ethanol and deionized water after the hydrothermal reaction and dried in a vacuum oven at 60 °C.

### **Preparation of Fe-Ni<sub>3</sub>S<sub>2</sub>/NF**

In general, 121.2 mg of cysteine and 15 mL of NMP is mixed by sonication for 30 minutes. The prepared NiFe-LDH/NF is immersed in the above solution. Then, the mixture is poured into a hydrothermal reactor with a capacity of 20 mL. The hydrothermal reactor is then placed in an oven at 200 °C for 20 hours. The sample is rinsed with ethanol and deionized water and dried in a vacuum oven at 60 °C.

### **Preparation of Fe, Mo-Ni<sub>3</sub>S<sub>2</sub>/NF**

Fe, Mo-Ni<sub>3</sub>S<sub>2</sub>/NF is synthesized in a similar way to Fe-Ni<sub>3</sub>S<sub>2</sub>/NF. 121.2 mg of cysteine and 61 mg of Na<sub>2</sub>MoO<sub>4</sub> are added to 15 mL of NMP and sonicated for 30 minutes. The prepared NiFe-LDH/NF is immersed in the above solution. Then, the mixture is poured into a hydrothermal reactor with a capacity of 20 mL. The hydrothermal reactor is then placed in an oven at 200 °C for 20 hours. The sample is rinsed with ethanol and deionized water and dried in a vacuum oven at 60 °C.

#### **Preparation of Pt/C (20 wt. %)/NF**

The 5 mg of Pt/C (20 wt. %) is added to a mixed solution of 20 microliters of Nafion (5%), 240 microliters of deionized water, and 240 microliters of anhydrous ethanol solution to form ink. Then the ink is evenly spread on the NF (Geometric Area: 1.0 cm<sup>2</sup>).

#### **Preparation of IrO<sub>2</sub>/NF**

The 5 mg of IrO<sub>2</sub> and 5 mg of graphene are added to a mixed solution of 20 microliters of Nafion (5%), 240 microliters of deionized water, and 240 microliters of anhydrous ethanol solution to form ink. Then the ink is evenly spread on the NF (Geometric Area: 1.0 cm<sup>2</sup>).

#### **Material characterization**

The crystallinity and crystal structure of the synthesised catalysts are characterised by powder X-ray diffraction instrumentation. The instrument model used is the PAN analytical Empyrean XRD system. A high-resolution transmission electron microscope for characterisation the morphology, size, and element distribution of the synthesized catalyst. The instrument model is FEI Tecnai F20. X-ray photoelectron

spectroscopy (XPS) is applied to characterize the element valence, surface composition, and relative content of each element of the synthesized catalyst. The instrument model used is XSAM800 photoelectron spectrometer. The Raman beam is detected on a Raman spectrometer (Renishaw in Via plus) with a 532 nm laser wavelength. The scanning electron microscopy (SEM) is performed on a JEOLJSM 6700-F scanning electron microscope. The transmission electron microscope (TEM) and high-resolution transmission electron microscope (HRTEM) images are taken on the JEM-2010 transmission electron microscope system. The Park system is used for atomic force microscopy (AFM).

### **Electrochemical measurements**

Electrochemistry is tested in a typical three-electrode system. The synthesized catalyst is used as the working electrode, the carbon rod is used as the counter electrode, and the Hg/HgO electrode is used as the reference electrode (CHI 760E, Inc. Shanghai). The electrocatalytic activity of OER, HER, and overall water splitting are tested by using linear scanning voltammetry (LSV) at room temperature at a scan rate of 5  $\text{mV}\cdot\text{s}^{-1}$  in 1.0 M KOH and corrected for the automatic iR compensation (90%). EIS data are recorded at open-circuit potentials. Stability is measured by cyclic voltammetry and amperometric i-t curve. The electrochemical double layer capacitance ( $C_{dl}$ ) is also determined by cyclic voltammetry (CV). The electrochemically active surface area can be assessed by the slope of the charge current versus scan rate curve, which is proportional to  $C_{dl}$ . All potentials in the article have been converted to hydrogen electrodes ( $E_{RHE} = 0.059\cdot\text{pH} + E^0_{(\text{Hg}/\text{HgO})} +$

$E_{(\text{Hg}/\text{HgO})}$ ). The Faraday efficiency is measured by comparing the experimentally measured and theoretically calculated amount of gas. The Faraday yield is calculated from the total amount of oxygen produced ( $n_{\text{O}_2}$ : mmol) and the total amount of charge  $Q$  (C) passing through the cell. Suppose four electrons are required to produce

$\text{O}_2$  molecule, the faradaic efficiency =  $4F \times \frac{n_{\text{O}_2}}{Q} = 4F \times \frac{n_{\text{O}_2} \times 10}{t}$ , where  $Q = t \times 0.1$  (C),  $F$  is the Faraday constant, and  $t$  represents the time (s) for the test time. The overall quantity of oxygen produced during the test is calculated by means of drainage.

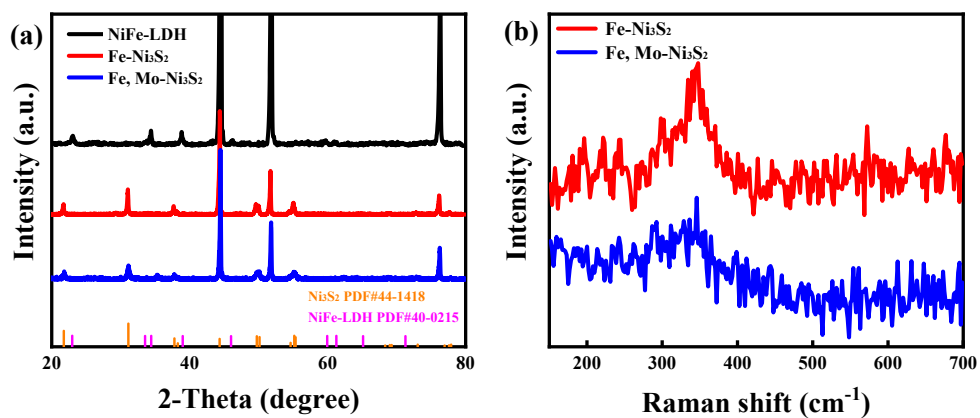

Fig. S1. (a) XRD and (b) Raman spectrum patterns of NiFe-LDH, Fe-Ni<sub>3</sub>S<sub>2</sub>, and Fe, Mo-Ni<sub>3</sub>S<sub>2</sub> catalysts.

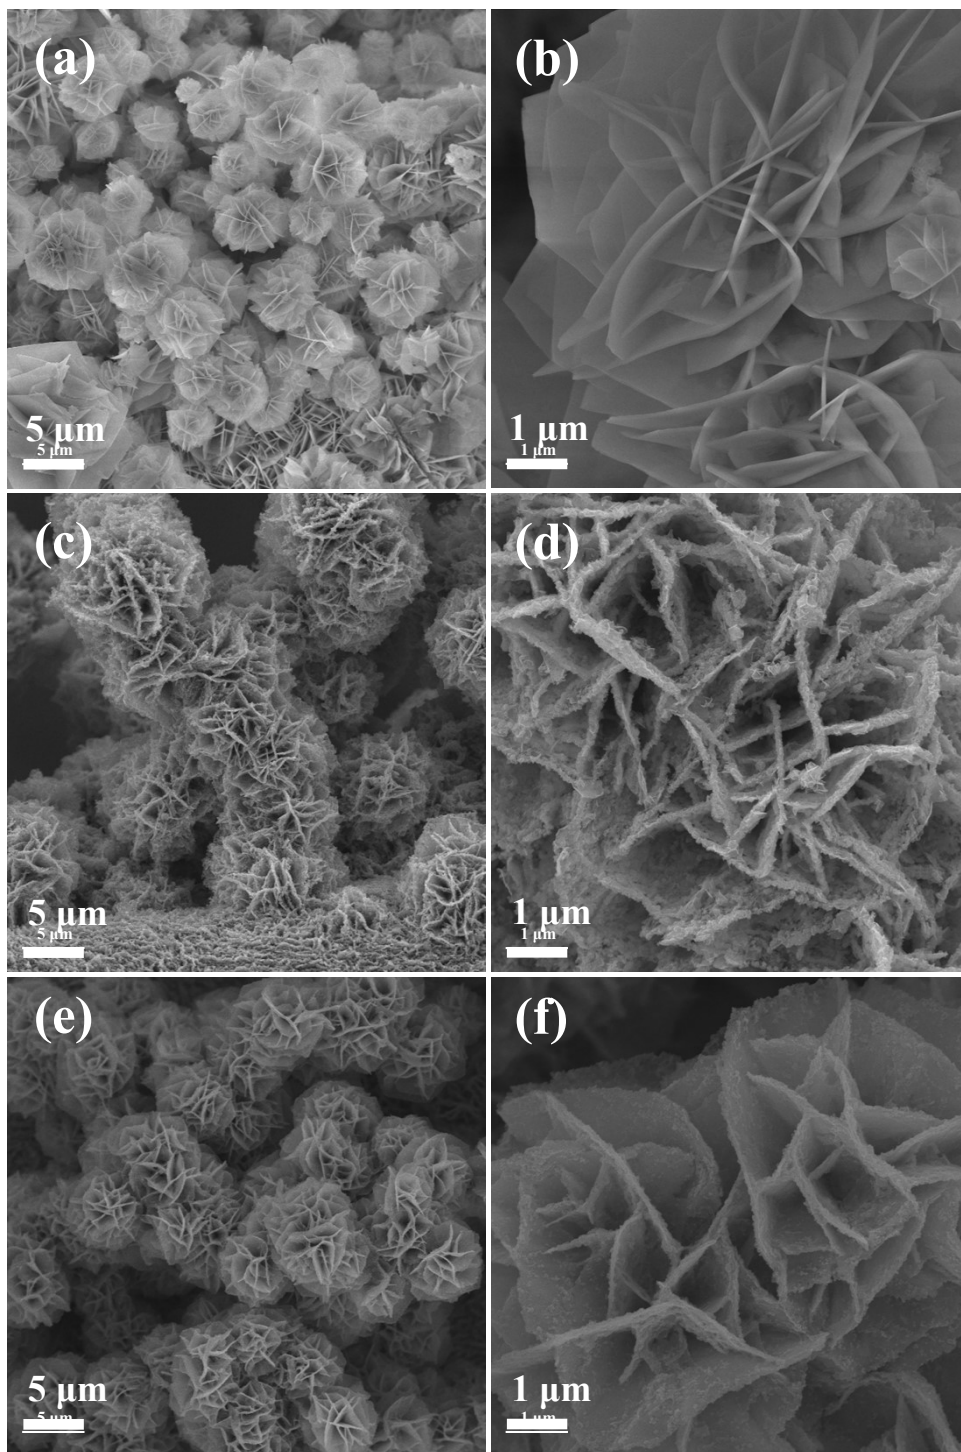

Fig. S2. SEM images with different magnifications of (a, b) NiFe-LDH, (c, d) Fe-Ni<sub>3</sub>S<sub>2</sub>, and (e, f) Fe, Mo-Ni<sub>3</sub>S<sub>2</sub>.

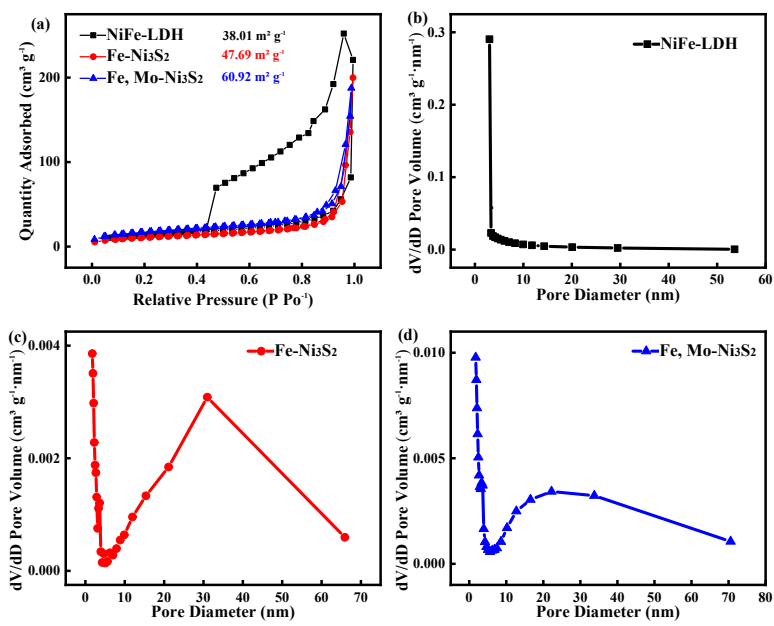

Fig. S3. (a) Nitrogen adsorption-desorption isotherms of different catalysts, pore size distribution of (b) NiFe-LDH, (c) Fe-Ni<sub>3</sub>S<sub>2</sub>, (d) Fe, Mo-Ni<sub>3</sub>S<sub>2</sub>.



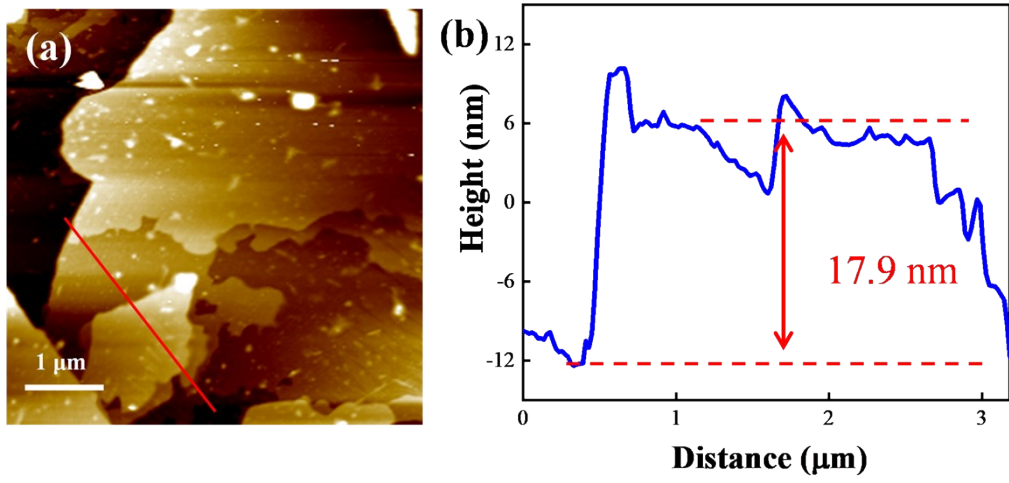

Fig. S4. AFM images of NiFe-LDH.

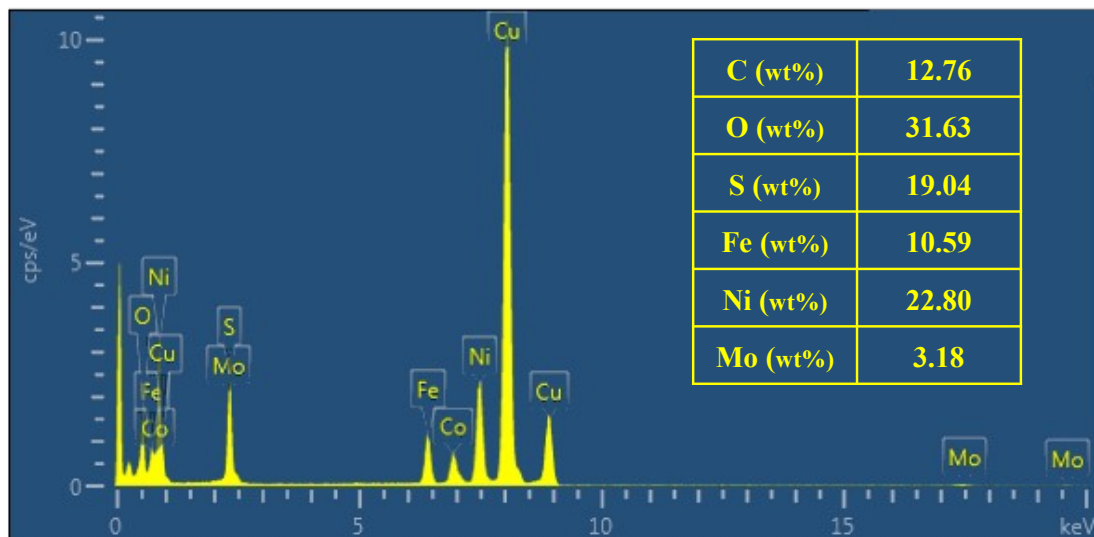

Fig. S5. EDS spectrum of Fe, Mo-Ni<sub>3</sub>S<sub>2</sub> sample.

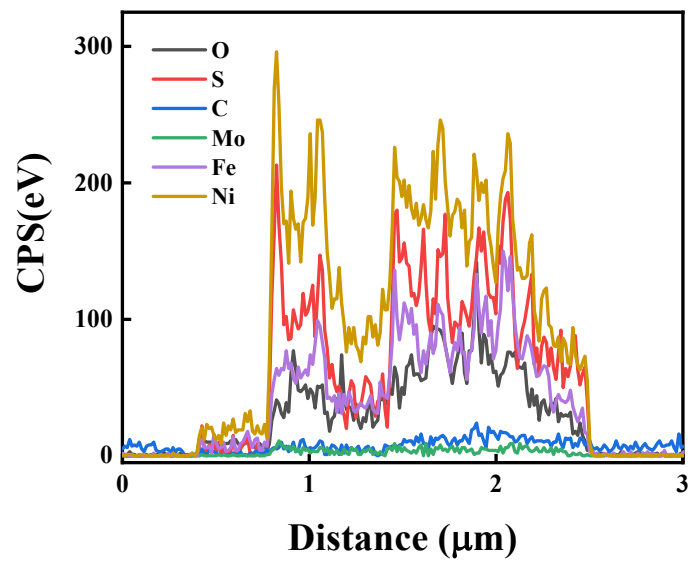

Fig. S6. EDS line scan profiles of Fe, Mo-Ni<sub>3</sub>S<sub>2</sub>.

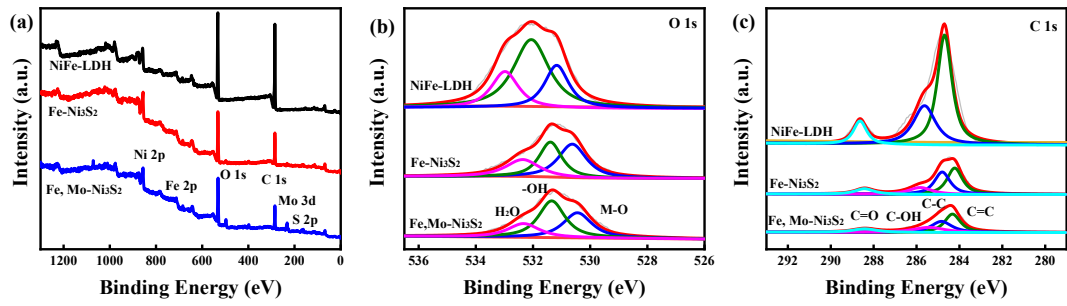

Fig. S7. XPS spectra of NiFe-LDH, Fe-Ni<sub>3</sub>S<sub>2</sub>, and Fe, Mo-Ni<sub>3</sub>S<sub>2</sub> catalysts (a) full spectrum, (b) O 1s, and (c) C 1s.

**Table S1.** The atomic percentage of different elements in various catalysts.

|                                           | <b>Ni (at.%)</b> | <b>Fe (at.%)</b> | <b>S (at.%)</b> | <b>O (at.%)</b> | <b>C (at.%)</b> | <b>Mo (at.%)</b> |
|-------------------------------------------|------------------|------------------|-----------------|-----------------|-----------------|------------------|
| <b>NiFe-LDH</b>                           | 4.05             | 1.51             | 0               | 27.83           | 66.61           | 0                |
| <b>Fe-Ni<sub>3</sub>S<sub>2</sub></b>     | 8.45             | 3.23             | 5.67            | 33.42           | 49.24           | 0                |
| <b>Fe, Mo-Ni<sub>3</sub>S<sub>2</sub></b> | 8.03             | 3.4              | 7.45            | 36.05           | 42.96           | 2.12             |

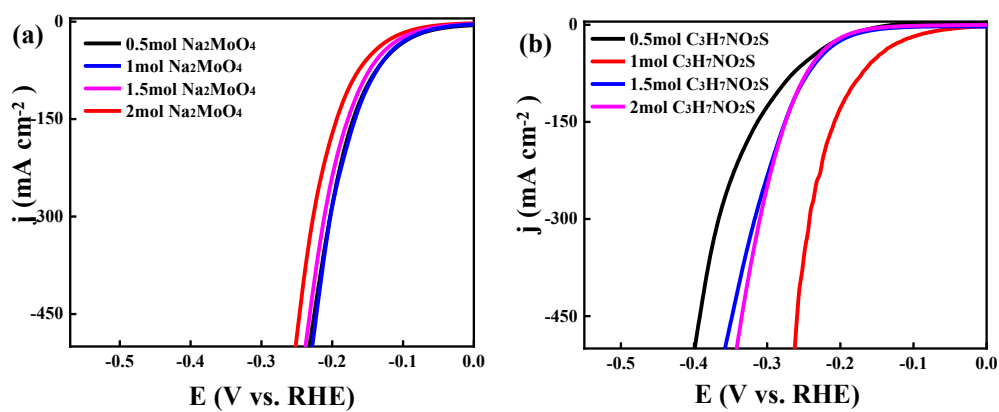

Fig. S8. HER polarization curves of catalysts prepared under different conditions.

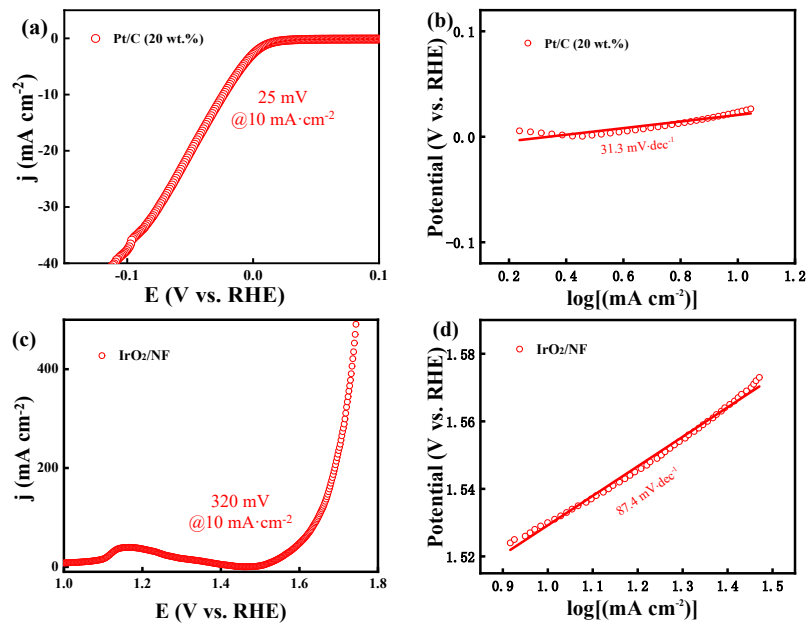

Fig. S9. (a) HER polarization curves of Pt/C/NF (20 wt.%) and (c) OER polarization curves of IrO<sub>2</sub>/NF; (b, d) the corresponding Tafel slopes.

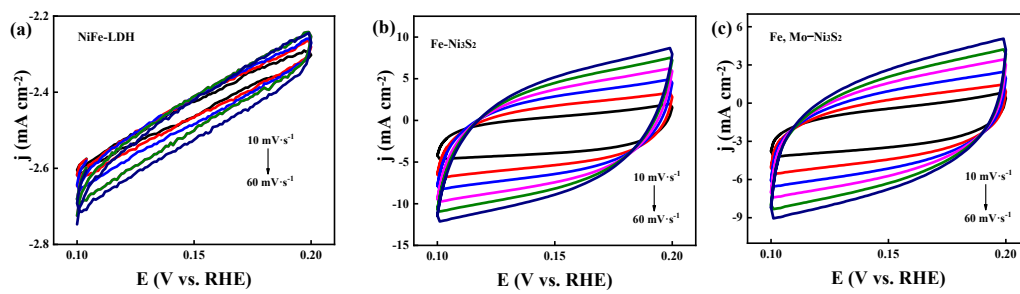

Fig. S10. (a-c) CV curves under different scanning speeds for NiFe-LDH, Fe-Ni<sub>3</sub>S<sub>2</sub>, and Fe, Mo-Ni<sub>3</sub>S<sub>2</sub> in  $1.0 \text{ M KOH}$  solution of HER.



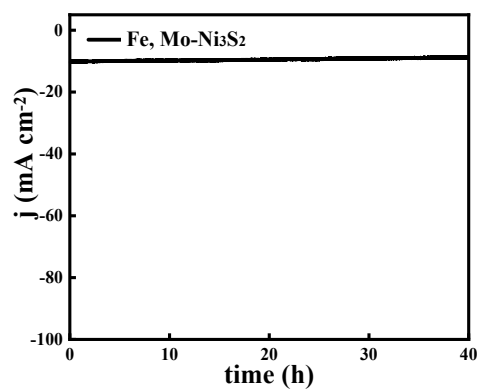

Fig. S11. I-t curves for the Fe, Mo-Ni<sub>3</sub>S<sub>2</sub> in 1.0 M KOH solution of HER.

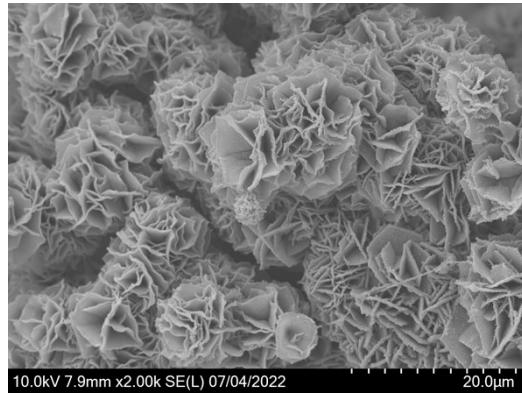

Fig. S12. SEM images of Fe, Mo-Ni<sub>3</sub>S<sub>2</sub> catalysts after HER stability test.

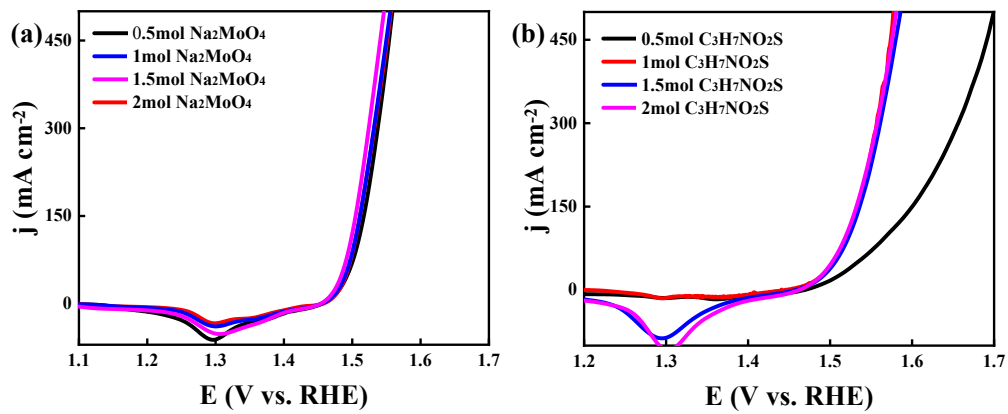

Fig. S13. OER polarization curves of catalysts prepared under different conditions.

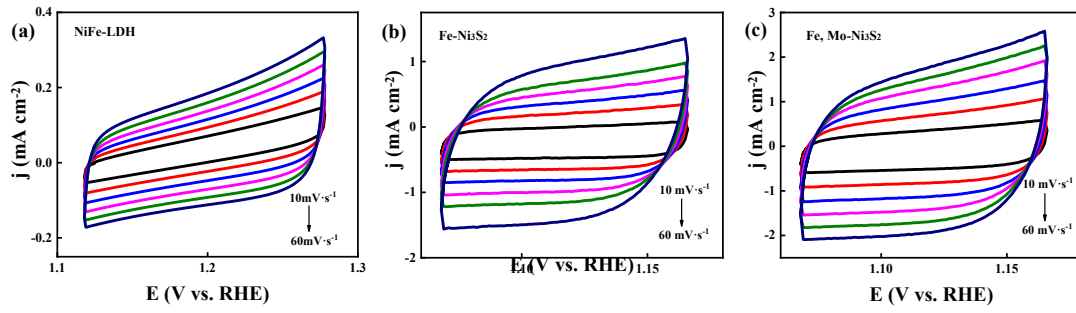

Fig. S14. (a-c) CV curves under different scanning speeds for NiFe-LDH, Fe-Ni<sub>3</sub>S<sub>2</sub>, and Fe, Mo-Ni<sub>3</sub>S<sub>2</sub> in 1.0 M KOH solution of OER.

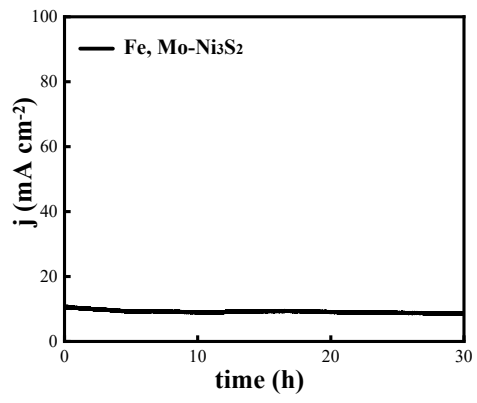

Fig. S15. I-t curves for the as-prepared samples in 1.0 M KOH solution of OER.

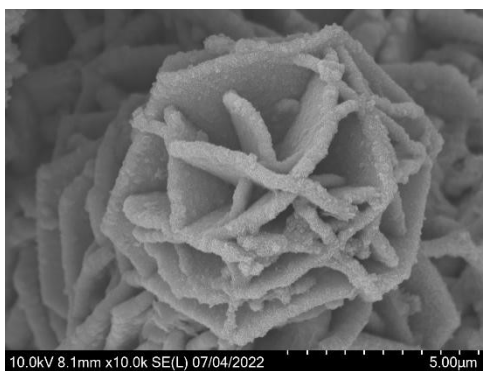

Fig. S16. SEM images of Fe, Mo-Ni<sub>3</sub>S<sub>2</sub> catalysts after OER stability test.

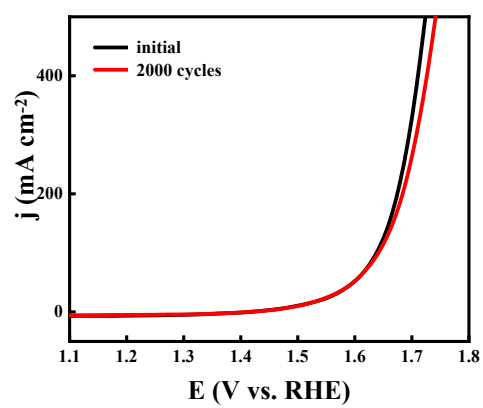

Fig. S17. The CV scanning of overall water splitting before and after 2000 cycles.

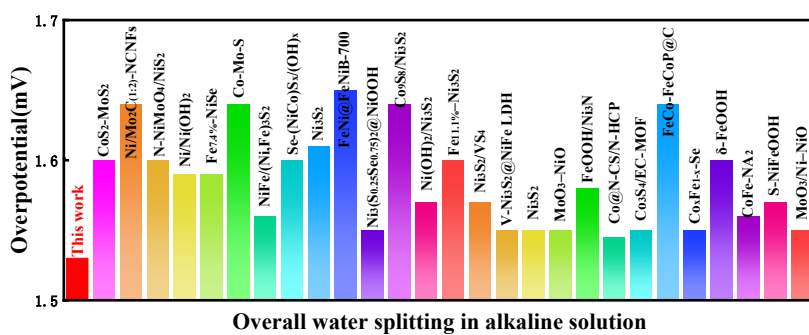

Fig. S18. Comparison of recently reported catalysts for overall water splitting.



Table S2. Summary of representative catalysts that have been recently reported in alkaline medium of HER in 1.0 M KOH.

| Catalyst                                                 | $\eta$ (mV) <sub>@j</sub><br>(mA cm <sup>-2</sup> ) | Substrate    | Reference                                                       |
|----------------------------------------------------------|-----------------------------------------------------|--------------|-----------------------------------------------------------------|
| Fe, Mo-Ni <sub>3</sub> S <sub>2</sub>                    | 67@10                                               | Ni foam      | This work                                                       |
| NiCo <sub>2</sub> S <sub>4</sub>                         | 80@10                                               | Ni foam      | <i>Adv. Funct. Mater.</i> , <b>2019</b> , 29, 1807031           |
| Se-(NiCo)S <sub>x</sub> /(OH) <sub>x</sub>               | 103@10                                              | Ni foam      | <i>Adv. Mater.</i> , <b>2018</b> , 30, 1705538                  |
| NiFe LDH@NiCoP                                           | 120@10                                              | Ni foam      | <i>Adv. Funct. Mater.</i> , <b>2018</b> , 28, 1706847           |
| CoV/CF-CWs                                               | 118@10                                              | Cu foam      | <i>Adv. Funct. Mater.</i> , <b>2021</b> , 31, 2008822           |
| Fe <sub>0.09</sub> Co <sub>0.13</sub> -NiSe <sub>2</sub> | 92@10                                               | Cu foam      | <i>Adv. Mater.</i> , <b>2018</b> , 30, 1802121                  |
| CoP/NPC/TF                                               | 80@10                                               | Ti foam      | <i>Adv. Energy Mater.</i> , <b>2019</b> , 1803970               |
| Co-NiS <sub>2</sub> NSs                                  | 80@10                                               | Ni foam      | <i>Angew. Chem. Int. Ed.</i> , <b>2019</b> , 58,<br>18676-18682 |
| Cu@NiFe LDH                                              | 116@10                                              | Cu foam      | <i>Energy Environ. Sci.</i> , <b>2017</b> , 10, 1820            |
| CoNx@GDY NS                                              | 70@10                                               | Ni foam      | <i>Nano Energy</i> , <b>2019</b> , 59, 591-597                  |
| TiO <sub>2</sub> @CoCH                                   | 96@20                                               | carbon paper | <i>Nano Energy</i> , <b>2021</b> , 82, 105732                   |
| Ni <sub>2</sub> P/Ni <sub>3</sub> S <sub>2</sub>         | 80@10                                               | Ni foam      | <i>Nano Energy</i> , <b>2018</b> , 51, 26                       |
| Fe <sub>0.09</sub> Co <sub>0.13</sub> -NiSe <sub>2</sub> | 92@10                                               | carbon cloth | <i>Adv. Mater.</i> <b>2018</b> , 30, 1802121                    |
| NFN-MOF/NF                                               | 87@10                                               | Ni foam      | <i>Adv. Energy Mater.</i> <b>2018</b> , 1801065                 |
| Co <sub>3</sub> S <sub>4</sub> /EC-MOF                   | 84@10                                               | carbon cloth | <i>Adv. Mater.</i> <b>2019</b> , 31, 1806672                    |
| δ-FeOOH                                                  | 108@10                                              | Ni foam      | <i>Adv. Mater.</i> <b>2018</b> , 30, 1803144                    |
| CoMnCH/NF                                                | 180@10                                              | Ni foam      | <i>J. Am. Chem. Soc.</i> , <b>2017</b> , 139, 8320-             |

|                                                                      |        |              |                                                    |
|----------------------------------------------------------------------|--------|--------------|----------------------------------------------------|
| <b>CoFe-NA<sub>2</sub>/NF</b>                                        | 73@10  | Ni foam      | <i>J. Energy Chem.</i> , <b>2022</b> , 65, 405-414 |
| <b>Co<sub>0.9</sub>Fe<sub>0.1</sub>-Se/NF</b>                        | 125@10 | Ni foam      | <i>J. Energy Chem.</i> , <b>2021</b> , 60, 194-201 |
| <b>NiCo-MoS<sub>2</sub></b>                                          | 153@10 | carbon cloth | <i>J. Energy Chem.</i> , <b>2021</b> , 57, 587-592 |
| <b>Ni-Ni(OH)<sub>2</sub></b>                                         | 72@10  | Ni foam      | <i>J. Energy Chem.</i> , <b>2021</b> , 61, 236-242 |
| <b>(VO)<sub>2</sub>P<sub>2</sub>O<sub>7</sub>-Ni<sub>2</sub>P@NF</b> | 154@10 | Ni foam      | <i>J. Energy Chem.</i> , <b>2022</b> , 65, 674-680 |
| <b>MoS<sub>2</sub>-AB/NF</b>                                         | 77@10  | Ni foam      | <i>Nano Energy</i> , <b>2022</b> , 92, 106707      |

Table S3. Summary of representative catalysts that have been recently reported in alkaline medium of OER in 1.0 M KOH.

| Catalyst                                                                     | $\eta$ (mV)@j<br>(mA cm <sup>-2</sup> ) | Substrate    | Reference                                             |
|------------------------------------------------------------------------------|-----------------------------------------|--------------|-------------------------------------------------------|
| Fe, Mo-Ni <sub>3</sub> S <sub>2</sub>                                        | 240@10                                  | Ni foam      | This work                                             |
| LC-CoOOH NAs                                                                 | 290@10                                  | carbon cloth | <i>ACS Catal.</i> , <b>2021</b> , 11, 6104-6112       |
| Ni <sub>3</sub> FeN                                                          | 270@10                                  | Ni foam      | <i>ACS Nano</i> , <b>2018</b> , 12, 245-253           |
| Fe <sub>0.09</sub> Co <sub>0.13</sub> -NiSe <sub>2</sub>                     | 290@10                                  | carbon cloth | <i>Adv. Mater.</i> , <b>2018</b> , 30, 1802121        |
| a-CoVO <sub>x</sub>                                                          | 254@10                                  | Ni foam      | <i>ACS Catal.</i> , <b>2018</b> , 8, 644-650          |
| NiCo <sub>2</sub> S <sub>4</sub>                                             | 243@10                                  | Ni foam      | <i>Adv. Funct. Mater.</i> , <b>2019</b> , 29, 1807031 |
| Ni/Mo <sub>2</sub> C-NCNFs                                                   | 288@10                                  | Ni foam      | <i>Adv. Energy Mater.</i> , <b>2019</b> , 9, 1803185  |
| NiFe <sub>x</sub> Sn@NiFe                                                    | 260@10                                  | carbon cloth | <i>Adv. Sci.</i> , <b>2020</b> , 7, 1903777           |
| (Ni <sub>2</sub> Co <sub>1</sub> ) <sub>0.925</sub> Fe <sub>0.075</sub> -MOF | 257@10                                  | Ni foam      | <i>Adv. Mater.</i> , <b>2019</b> , 31, 1901139        |
| NiFeCo-LDH                                                                   | 249@10                                  | carbon fiber | <i>Small</i> , <b>2020</b> , 16, 2002426              |
| CoNx@GDY NS                                                                  | 280@10                                  | Ni foam      | <i>Nano Energy</i> , <b>2019</b> , 59, 591-597        |
| CoFe-PBA                                                                     | 256@10                                  | Ni foam      | <i>Nano Energy</i> , <b>2020</b> , 68, 104371         |
| Ni(Fe)(OH) <sub>2</sub>                                                      | 275@10                                  | Ni foam      | <i>Nano Res.</i> , <b>2021</b> , 14, 4528-4533        |
| NiFeSn@NiFe                                                                  | 260@10                                  | carbon cloth | <i>Adv. Sci.</i> <b>2020</b> , 7, 1903777             |
| Co@N-CS/N-HCP@CC                                                             | 248@10                                  | carbon cloth | <i>Adv. Energy Mater.</i> , <b>2019</b> , 1803918     |
| Fe-Mn-O NS/CC                                                                | 273@10                                  | carbon cloth | <i>Adv. Funct. Mater.</i> , <b>2018</b> , 28, 1802463 |
| NiFe LDH                                                                     | 260@10                                  | Ni foam      | <i>Adv. Mater.</i> , <b>2019</b> , 31, 1903909        |
| $\delta$ -FeOOH                                                              | 265@10                                  | Ni foam      | <i>Adv. Mater.</i> , <b>2018</b> , 30, 1803144        |

|                                                          |        |              |                                                         |
|----------------------------------------------------------|--------|--------------|---------------------------------------------------------|
| $\gamma$ -FeOOH NAs                                      | 286@10 | Ni foam      | <i>Adv. Mater.</i> , <b>2021</b> , 33, 2005587          |
| Fe <sub>0.09</sub> Co <sub>0.13</sub> -NiSe <sub>2</sub> | 251@10 | carbon cloth | <i>Adv. Mater.</i> , <b>2018</b> , 30, 1802121          |
| FeOOH/Ni <sub>3</sub> N                                  | 244@10 | carbon cloth | <i>Appl. Catal. B</i> , <b>2020</b> , 269, 118600       |
| CoN <sub>x</sub> @GDY NS/NF                              | 270@10 | Ni foam      | <i>Nano Energy</i> , <b>2019</b> , 59, 591-597          |
| FeNiOOH(Se)                                              | 287@10 | Fe foam      | <i>J. Am. Chem. Soc.</i> , <b>2019</b> , 141, 7005-7013 |
| DL-Co <sub>3</sub> O <sub>4</sub> /NF                    | 256@20 | Ni foam      | <i>J. Energy Chem.</i> , <b>2020</b> , 47, 299-306      |
| Co <sub>0.9</sub> Fe <sub>0.1</sub> -Se/NF               | 246@10 | Ni foam      | <i>J. Energy Chem.</i> , <b>2021</b> , 60, 194-201      |
| CoFe-NA <sub>2</sub> /NF                                 | 250@10 | Ni foam      | <i>J. Energy Chem.</i> , <b>2022</b> , 65, 405-414      |
| NH <sub>4</sub> CoPO <sub>4</sub> ·H <sub>2</sub> O/Co   | 254@10 | Co foil      | <i>J. Energy Chem.</i> , <b>2020</b> , 51, 167-174      |
| FCND                                                     | 337@50 | Ni foam      | <i>J. Energy Chem.</i> , <b>2021</b> , 55, 10-16        |

Table S4. Summary of representative catalysts that have been recently reported in alkaline medium of overall water splitting in 1.0 M KOH.

| Catalyst                                                                    | $\eta$ (mV)@j<br>(mA cm <sup>-2</sup> ) | Substrate      | Reference                                             |
|-----------------------------------------------------------------------------|-----------------------------------------|----------------|-------------------------------------------------------|
| Fe, Mo-Ni <sub>3</sub> S <sub>2</sub>                                       | 1.53@10                                 | Ni foam        | This work                                             |
| CoS <sub>2</sub> -MoS <sub>2</sub>                                          | 1.6@10                                  | carbon cloth   | <i>ACS Catal.</i> , <b>2018</b> , 8, 4612-4621        |
| Ni/Mo <sub>2</sub> C <sub>(1:2)</sub> -NCNFs                                | 1.64@10                                 | Ni foam        | <i>Adv. Energy Mater.</i> , <b>2019</b> , 1803185     |
| N-NiMoO <sub>4</sub> /NiS <sub>2</sub>                                      | 1.6@10                                  | carbon cloth   | <i>Adv. Funct. Mater.</i> , <b>2019</b> , 29, 1805298 |
| Ni/Ni(OH) <sub>2</sub>                                                      | 1.59@10                                 | carbon papers  | <i>Adv. Mater.</i> , <b>2020</b> , 32, 1906915        |
| Fe <sub>7.4%</sub> -NiSe                                                    | 1.59@10                                 | Ni foam        | <i>J. Mater. Chem. A</i> , <b>2019</b> , 7, 2233      |
| Co-Mo-S/CC                                                                  | 1.64@10                                 | carbon cloth   | <i>Nanoscale</i> , <b>2018</b> , 10, 8404-8412        |
| NiFe/(Ni,Fe) <sub>3</sub> S <sub>2</sub>                                    | 1.56@10                                 | graphite plate | <i>Small Methods</i> , <b>2019</b> , 1900234          |
| Se-(NiCo)S <sub>x</sub> /(OH) <sub>x</sub>                                  | 1.6@10                                  | Ni foam        | <i>Adv. Mater.</i> , <b>2018</b> , 30, 1705538        |
| Ni <sub>3</sub> S <sub>2</sub>                                              | 1.61@10                                 | Ni foil        | <i>Appl. Catal. B</i> , <b>2019</b> , 243, 693-702    |
| FeNi@FeNiB-700                                                              | 1.65@10                                 | FeNi foam      | <i>J. Mater. Chem. A</i> , <b>2019</b> , 7, 19554     |
| Ni <sub>3</sub> (S <sub>0.25</sub> Se <sub>0.75</sub> ) <sub>2</sub> @NiOOH | 1.55@10                                 | Ni foam        | <i>Small</i> , <b>2018</b> , 14, 1803666              |
| Co <sub>9</sub> S <sub>8</sub> /Ni <sub>3</sub> S <sub>2</sub>              | 1.64@10                                 | Ni foam        | <i>Appl. Catal. B</i> , <b>2019</b> , 253, 246-252    |
| Ni(OH) <sub>2</sub> /Ni <sub>3</sub> S <sub>2</sub>                         | 1.57@10                                 | Ni foam        | <i>J. Mater. Chem. A</i> , <b>2018</b> , 6, 6938      |
| Fe <sub>11.1%</sub> -Ni <sub>3</sub> S <sub>2</sub>                         | 1.6@10                                  | Ni foam        | <i>J. Mater. Chem. A</i> , <b>2018</b> , 6, 4346      |
| Ni <sub>3</sub> S <sub>2</sub> /VS <sub>4</sub>                             | 1.57@10                                 | Ni foam        | <i>Appl. Catal. B</i> , <b>2019</b> , 257, 117911     |

|                                               |          |              |                                                    |
|-----------------------------------------------|----------|--------------|----------------------------------------------------|
| <b>V-Ni<sub>3</sub>S<sub>2</sub>@NiFe LDH</b> | 1.55@10  | Ni foam      | <i>J. Mater. Chem. A</i> , <b>2019</b> , 7, 18118  |
| <b>Ni<sub>3</sub>S<sub>2</sub></b>            | 1.55@10  | Ni foam      | <i>J. Mater. Chem. A</i> , <b>2019</b> , 7, 18003  |
| <b>MoO<sub>3</sub>-NiO</b>                    | 1.55@10  | carbon cloth | <i>Adv. Mater.</i> <b>2020</b> , 32, 2003414       |
| <b>FeOOH/Ni<sub>3</sub>N</b>                  | 1.58@10  | carbon cloth | <i>Appl. Catal. B</i> , <b>2020</b> , 269, 118600  |
| <b>Co@N-CS/N-HCP</b>                          | 1.545@10 | carbon cloth | <i>Adv. Energy Mater.</i> , <b>2019</b> , 1803918  |
| <b>Co<sub>3</sub>S<sub>4</sub>/EC-MOF</b>     | 1.55@10  | carbon cloth | <i>Adv. Mater.</i> , <b>2019</b> , 31, 1806672     |
| <b>FeCo-FeCoP@C</b>                           | 1.64@10  | carbon cloth | <i>J. Energy Chem.</i> , <b>2021</b> , 53, 1-8     |
| <b>Co<sub>x</sub>Fe<sub>1-x</sub>-Se</b>      | 1.55@10  | Ni foam      | <i>J. Energy Chem.</i> , <b>2021</b> , 60, 194-201 |
| <b>δ-FeOOH</b>                                | 1.6@10   | Ni foam      | <i>Adv. Mater.</i> , <b>2018</b> , 30, 1803144     |
| <b>CoFe-NA<sub>2</sub></b>                    | 1.56@10  | Ni foam      | <i>J. Energy Chem.</i> , <b>2022</b> , 65, 405-414 |
| <b>S-NiFeOOH</b>                              | 1.57@10  | Ni foam      | <i>J. Energy Chem.</i> , <b>2022</b> , 64, 364-371 |
| <b>MoO<sub>3</sub>/Ni-NiO</b>                 | 1.55@10  | carbon cloth | <i>Adv. Mater.</i> , <b>2020</b> , 32, 2003414     |
